# Supplementary material for: Sustained Inflammasome Activity in Macrophages Impairs Wound Healing in Type 2 Diabetic Humans and Mice
Source: PubMed Central journal article supplement — Diabetes. 2014 Feb 13;63(3):1103–14. doi: 10.2337/db13-0927 (PMC3931398; doi:10.2337/db13-0927), 2014-02-13

SUPPLEMENTARY DATA

**Supplementary Table 1.** Human Subject data.

|                                  |              |
|----------------------------------|--------------|
| Age (years)                      | 62.4 (6.2)   |
| Body mass (kg)                   | 99.2 (33.8)  |
| Body mass index                  | 32.7 (3.6)   |
| Blood glucose (mg/dl)            | 171.3 (51.8) |
| Wound area (cm <sup>2</sup> )    | 81.8 (37.4)  |
| Insulin (n/N)                    | 3/5          |
| Anti-diabetic drugs (n/N)        | 1/5          |
| Anti-hypertensive drugs (n/N)    | 5/5          |
| Cholesterol lowering drugs (n/N) | 3/5          |
| Beta-blocker drugs (n/N)         | 5/5          |
| Aspirin (n/N)                    | 5/5          |

Values reported are mean (S.D.) or number of patients taking class of drug.  
NB: none of the subjects were taking glyburide.

**Supplementary Table 2.** Mouse data.

|                       | db/+<br>untreated | db/db<br>untreated | db/db<br>DMSO | Db/db<br>glyburide | db/db<br>YVAD | db/db<br>BMT<br>WT | db/db<br>BMT<br>NLRP-3 | Db/db<br>BMT<br>caspase-<br>1 |
|-----------------------|-------------------|--------------------|---------------|--------------------|---------------|--------------------|------------------------|-------------------------------|
| Body weight (g)       | 27.7 (1.7)        | 47.1 (4.1)         | 48.3 (5.3)    | 45.1 (4.3)         | 48.1 (4.2)    | 47.4 (4.9)         | 47.2 (3.2)             | 46.6 (3.3)                    |
| Blood glucose (mg/dl) | 152 (10)          | 405 (108)          | 415 (124)     | 393 (114)          | 397 (92)      | 433 (89)           | 413 (79)               | 427 (86)                      |

SUPPLEMENTARY DATA

**Supplementary Figure 1.** Topical treatment with inflammasome inhibitors results in increased  $\alpha$ -smooth muscle actin staining in wounds of db/db mice. Excisional wounds in db/db mice were treated topically with DMSO vehicle, glyburide (Glyb) or YVAD. Top: note that  $\alpha$ -smooth muscle actin staining in DMSO treated wounds was primarily associated with vessels, and that there was more staining in Glyb or YVAD treated wounds both associated with vessels and throughout granulation tissue. Bottom: staining in wound cryosections quantified using image analysis and normalized to DMSO condition. Bars = mean  $\pm$  SD, n = 6-8. Data compared between groups using ANOVA. \*mean value significantly different from that for mice receiving WT bone marrow, p < 0.05.

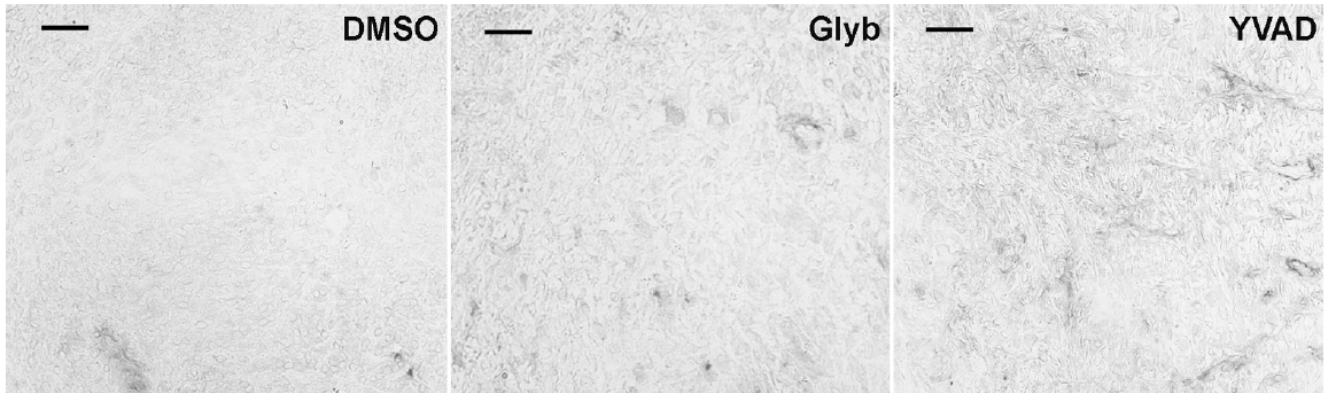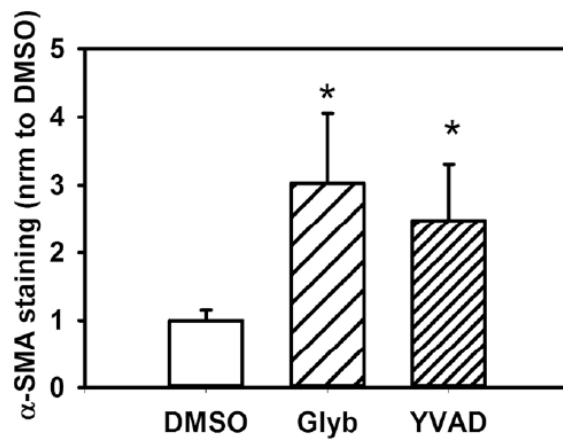

SUPPLEMENTARY DATA

**Supplementary Figure 2.** Bone marrow transfer from NLRP-3 and caspase-1 null mice to db/db mice results in increased  $\alpha$ -smooth muscle actin staining in wounds of db/db mice. Db/db mice were subjected to lethal irradiation and then bone marrow was transferred from wild-type (WT-db), NLRP-3 null (N3-db) or Caspase-1 null (C1-db) mice.  $\alpha$ -smooth muscle actin staining in wound cryosections normalized to WT-db condition. Bars = mean  $\pm$  SD, n = 6-8. Data compared between groups using ANOVA. \*mean value significantly different from that for mice receiving WT bone marrow, p < 0.05.

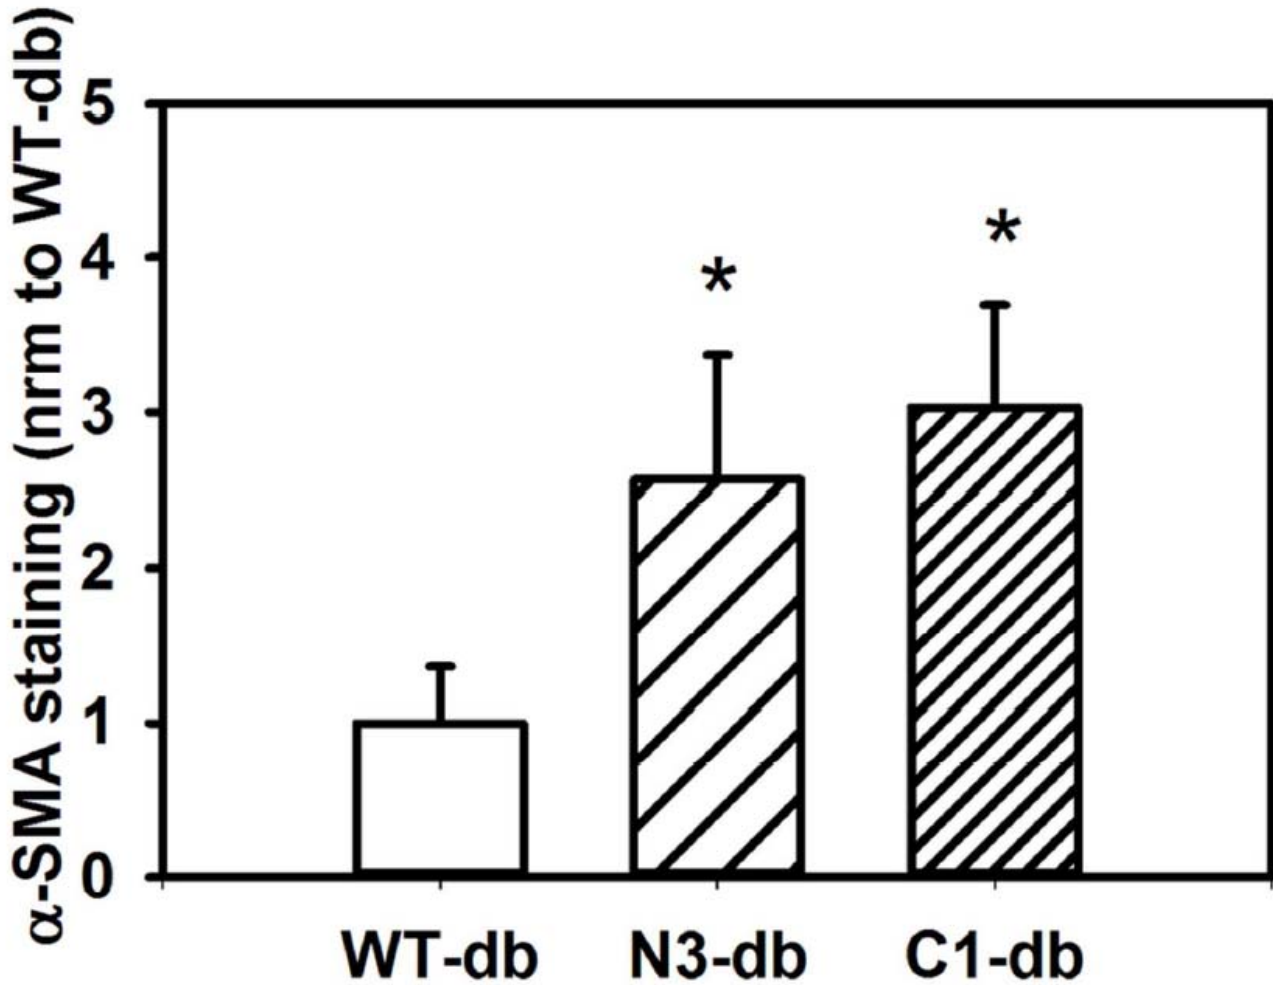

Supplement: supp_db13-0927_DB130927SupplementaryData.pdf [file supp_db13-0927_DB130927SupplementaryData.pdf]
